# Supplementary material for: Synthesis and properties of optically active helical polymers from (S)-3-functional-3′-vinyl-BINOL derivatives
Source: Royal Society of Chemistry journal article supplement (doi:10.1039/c6ra08146k), 2016-01-01

Supplementary Information for

Synthesis and Properties of Optically Active Helical Polymers from

(S)-3-Functional-3'-Vinyl-BINOL Derivatives

Chunhui Zhao, Kunbing Ouyang\*, Jin Zhang and Nianfa Yang\*

Key Laboratory of Environmentally Friendly Chemistry and Applications of Ministry of Education,  
College of Chemistry, Xiangtan University, Xiangtan 411105, China.

\*Corresponding author E-mails: kbouyang@xtu.edu.cn, nianfayang@xtu.edu.cn

Synthesis of (S)-4b, (S)-4c, (S)-5b, (S)-5c, (S)-6b and (S)-6c.

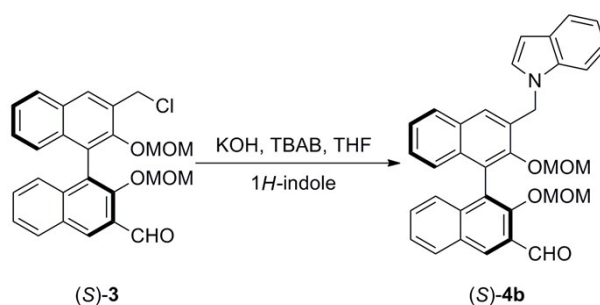

(S)-3'-((1H-indol-1-yl)methyl)-2,2'-bis(methoxymethoxy)-[1,1'-binaphthalene]-3-carbaldehyde, ((S)-4b), 83 % (1.47 g) as yellow oil:  $^1\text{H}$  NMR  $\delta$  10.59 (s, 1H), 8.62 (s, 1H), 8.08 (d,  $J = 7.6$  Hz, 1H), 7.73 (d,  $J = 6.9$  Hz, 1H), 7.64 (d,  $J = 7.6$  Hz, 1H), 7.52 (d,  $J = 7.1$  Hz, 1H), 7.45 (d,  $J = 7.0$  Hz, 1H), 7.38 (d,  $J = 7.7$  Hz, 1H), 7.32 (s, 2H), 7.28 (s, 1H), 7.22 (d,  $J = 8.1$  Hz, 2H), 7.15 (dd,  $J = 18.5, 9.8$  Hz, 3H), 6.67 (s, 1H), 5.72 (d,  $J = 23.1$  Hz, 2H), 4.64 (s, 2H), 4.56 (s, 2H), 3.10 (s, 3H), 2.90 (s, 3H).  $^{13}\text{C}$  NMR  $\delta$  190.79, 153.93, 152.40, 136.94, 136.34, 133.24, 131.91, 131.43, 130.77, 130.33, 130.02, 129.61, 129.02, 128.74, 128.62, 126.75, 126.59, 126.18, 125.60, 125.41, 124.39, 121.82, 121.07, 119.65, 109.69, 101.96, 100.46, 99.79, 57.04, 46.00. Elem. Anal. Calcd. for  $\text{C}_{34}\text{H}_{29}\text{NO}_5$ : C, 76.82; H, 5.50. Found: C, 76.84; H, 5.48.

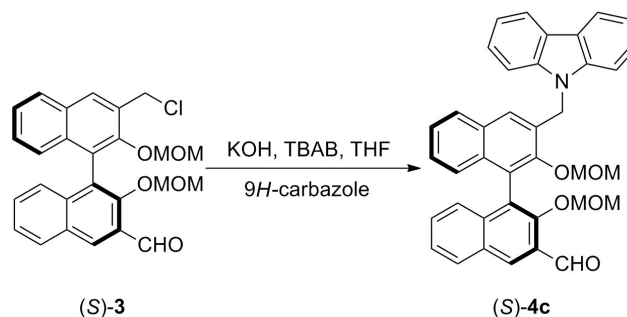

(S)-3'-((9H-carbazol-9-yl)methyl)-2,2'-bis(methoxymethoxy)-[1,1'-binaphthalene]-3-carbaldehyde ((S)-4c), 84 % (1.63 g) as yellow oil:  $^1\text{H}$  NMR  $\delta$  10.62 (s, 1H), 8.64 (s, 1H), 8.22 (d,  $J = 7.2$  Hz, 2H), 8.10 (d,  $J = 7.7$  Hz, 1H), 7.53 (d,  $J = 7.7$  Hz, 1H), 7.46 (s, 7H), 7.32 (s, 3H), 7.22 – 7.17 (m, 2H), 7.12 (d,  $J = 7.9$  Hz, 1H), 5.90 (q,  $J = 17.9$  Hz, 2H), 4.68 (s, 4H), 3.20 (s, 3H), 2.91 (s, 3H).  $^{13}\text{C}$  NMR  $\delta$  190.82, 153.93,

152.73, 140.80, 136.98, 133.17, 132.03, 130.81, 130.56, 130.09, 130.09, 129.69, 129.06, 128.16, 126.68, 126.30, 126.25, 126.04, 125.58, 125.34, 124.45, 123.16, 120.57, 119.43, 108.87, 100.58, 100.03, 57.23, 57.09, 42.63. Elem. Anal. Calcd. for  $C_{38}H_{31}NO_5$ : C, 78.47; H, 5.37. Found: C, 78.44; H, 5.38.

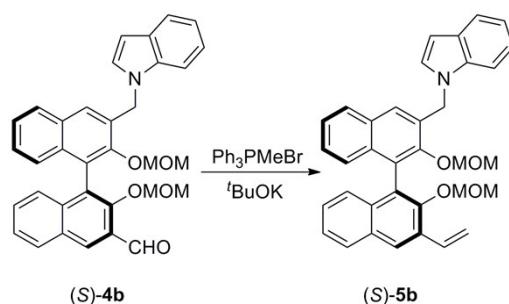

**(S)-1-((2,2'-bis(methoxymethoxy)-3'-vinyl-[1,1'-binaphthalen]-3-yl)methyl)-1H-indole ((S)-5b)**, 95 % (1.15 g) as a white solid:  $^1H$  NMR  $\delta$  8.16 (s, 1H), 7.92 (d,  $J = 7.8$  Hz, 1H), 7.73 (d,  $J = 7.1$  Hz, 1H), 7.59 (d,  $J = 7.7$  Hz, 1H), 7.42 (d,  $J = 7.0$  Hz, 1H), 7.37 (d,  $J = 7.5$  Hz, 1H), 7.29 (d,  $J = 9.8$  Hz, 3H), 7.20 (s, 3H), 7.18 (s, 2H), 7.16 (s, 2H), 6.67 (s, 1H), 6.00 (d,  $J = 17.6$  Hz, 1H), 5.73 (dd,  $J = 17.1$  Hz, 2H), 5.47 (d,  $J = 10.8$  Hz, 1H), 4.68 (d,  $J = 4.9$  Hz, 1H), 4.58 (s, 1H), 4.55 (s, 2H), 3.15 (s, 3H), 2.56 (s, 3H).  $^{13}C$  NMR  $\delta$  152.20, 151.46, 136.40, 133.59, 132.54, 131.78, 131.35, 130.90, 130.72, 128.72, 128.25, 127.91, 126.74, 126.66, 126.33, 125.98, 125.43, 125.18, 121.80, 121.05, 119.62, 116.39, 109.76, 101.89, 99.62, 99.17, 57.08, 56.36, 46.08. Elem. Anal. Calcd. for  $C_{35}H_{31}NO_4$ : C, 79.37; H, 5.90. Found: C, 79.34; H, 5.92.

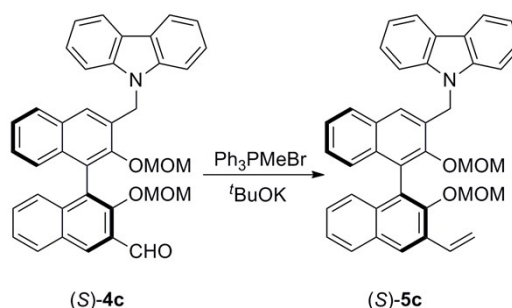

**(S)-9-((2,2'-bis(methoxymethoxy)-3'-vinyl-[1,1'-binaphthalen]-3-yl)methyl)-9H-carbazole ((S)-5c)**, 96 % (1.27 g) as a white solid:  $^1H$  NMR  $\delta$  8.22 (d,  $J = 7.5$  Hz, 2H), 8.18 (s, 1H), 7.94 (d,  $J = 7.9$  Hz, 1H), 7.46 (d,  $J = 8.1$  Hz, 6H), 7.31 (t,  $J = 7.0$  Hz, 4H), 7.26 – 7.21 (m, 2H), 7.17 (s, 2H), 7.09 (s, 1H), 6.02 (d,  $J = 17.7$  Hz, 1H), 5.92 (q,  $J = 18.4$  Hz, 2H), 5.49 (d,  $J = 10.9$  Hz, 1H), 4.74 (d,  $J = 5.2$  Hz, 1H), 4.66 (s, 2H), 4.59 (d,  $J = 5.1$  Hz, 1H), 3.25 (s, 3H), 2.58 (s, 3H).  $^{13}C$  NMR  $\delta$  152.65, 151.50, 140.93, 133.68, 133.59, 132.64, 131.91, 131.02, 130.80, 130.41, 128.35, 127.98, 126.85, 126.29, 126.14, 126.08, 125.56, 125.50, 125.16, 123.22, 120.59, 119.41, 116.49, 109.00, 99.95, 99.31, 57.36, 56.46, 42.86. Elem. Anal. Calcd. for  $C_{39}H_{33}NO_4$ : C, 80.81; H, 5.74. Found: C, 80.84; H, 5.78.

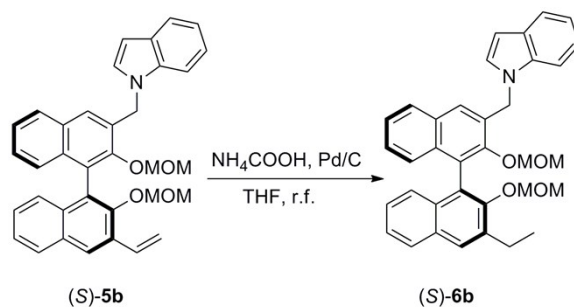

**(S)-1-((3'-ethyl-2,2'-bis(methoxymethoxy)-[1,1'-binaphthalen]-3-yl)methyl)-1H-indole ((S)-6b)**, 83 % (0.83 g) as colorless oil:  $^1\text{H NMR}$   $\delta$  7.87 (d,  $J = 8.6$  Hz, 1H), 7.85 (s, 1H), 7.73 (d,  $J = 7.2$  Hz, 1H), 7.59 (d,  $J = 8.2$  Hz, 1H), 7.43 – 7.35 (m, 2H), 7.30 (td,  $J = 6.3, 2.5$  Hz, 2H), 7.23 (d,  $J = 7.1$  Hz, 1H), 7.21 – 7.14 (m, 6H), 6.67 (d,  $J = 3.1$  Hz, 1H), 5.72 (dd,  $J = 44.6, 17.4$  Hz, 2H), 4.60 (d,  $J = 5.8$  Hz, 1H), 4.50 (dd,  $J = 13.0, 6.1$  Hz, 2H), 4.43 (d,  $J = 5.8$  Hz, 1H), 3.14 (s, 3H), 3.04 (dt,  $J = 15.0, 7.5$  Hz, 1H), 2.97 – 2.87 (m, 1H), 2.84 (s, 3H), 1.43 (t,  $J = 7.5$  Hz, 3H).  $^{13}\text{C NMR}$   $\delta$  153.09, 152.04, 137.58, 136.39, 133.67, 132.67, 131.44, 131.08, 130.66, 129.45, 128.71, 128.68, 128.32, 127.96, 127.57, 126.87, 126.43, 125.99, 125.94, 125.80, 125.67, 125.13, 125.03, 124.67, 121.78, 121.02, 119.59, 115.21, 109.74, 101.86, 99.43, 99.04, 57.01, 56.48, 46.06, 23.74, 14.54. Elem. Anal. Calcd. for  $\text{C}_{35}\text{H}_{33}\text{NO}_4$ : C, 79.07; H, 6.26. Found: C, 79.04; H, 6.28.

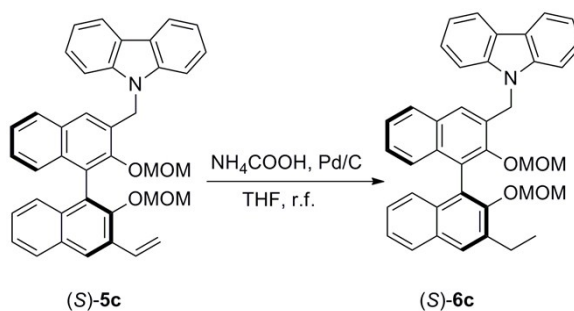

**(S)-9-((3'-ethyl-2,2'-bis(methoxymethoxy)-[1,1'-binaphthalen]-3-yl)methyl)-9H-carbazole ((S)-6c)**, 85 % (0.85 g) as colorless oil:  $^1\text{H NMR}$   $\delta$  8.22 (d,  $J = 7.7$  Hz, 2H), 7.88 (d,  $J = 9.5$  Hz, 2H), 7.50 – 7.39 (m, 6H), 7.34 – 7.29 (m, 2H), 7.27 (d,  $J = 1.2$  Hz, 1H), 7.22 (dd,  $J = 8.3, 3.6$  Hz, 2H), 7.17 (d,  $J = 3.5$  Hz, 2H), 7.08 (s, 1H), 5.91 (q,  $J = 18.7$  Hz, 2H), 4.65 (d,  $J = 5.8$  Hz, 1H), 4.64 – 4.60 (m, 2H), 4.46 (d,  $J = 5.8$  Hz, 1H), 3.25 (s, 3H), 3.07 (dt,  $J = 15.0, 7.5$  Hz, 1H), 2.94 (dq,  $J = 15.1, 7.4$  Hz, 1H), 2.86 (s, 3H), 1.46 (t,  $J = 7.5$  Hz, 3H).  $^{13}\text{C NMR}$   $\delta$  153.06, 152.46, 140.87, 137.65, 133.63, 132.71, 131.15, 130.70, 130.48, 128.36, 127.97, 127.63, 126.34, 126.02, 125.92, 125.78, 125.09, 124.76, 123.15, 120.53, 119.36, 108.95, 99.72, 99.14, 57.24, 56.55, 42.80, 23.73, 14.57. Elem. Anal. Calcd. for  $\text{C}_{39}\text{H}_{35}\text{NO}_4$ : C, 80.53; H, 6.06. Found: C, 80.55; H, 6.08.

# $^1\text{H}$ NMR and $^{13}\text{C}$ NMR Spectra of all Compounds

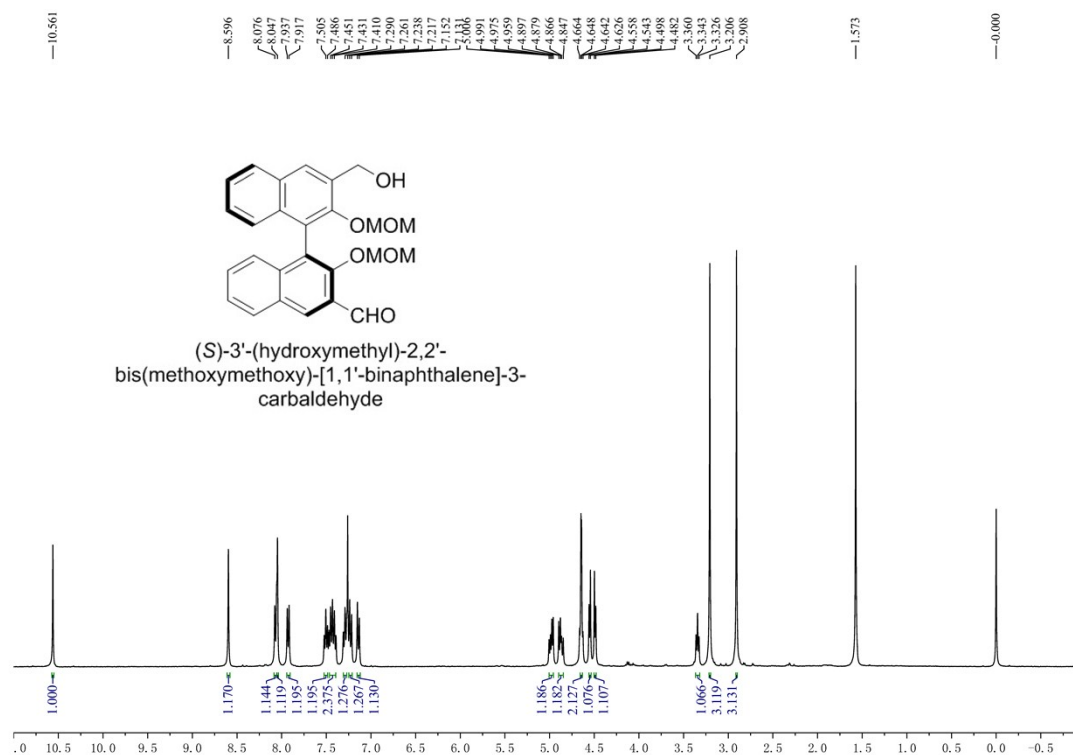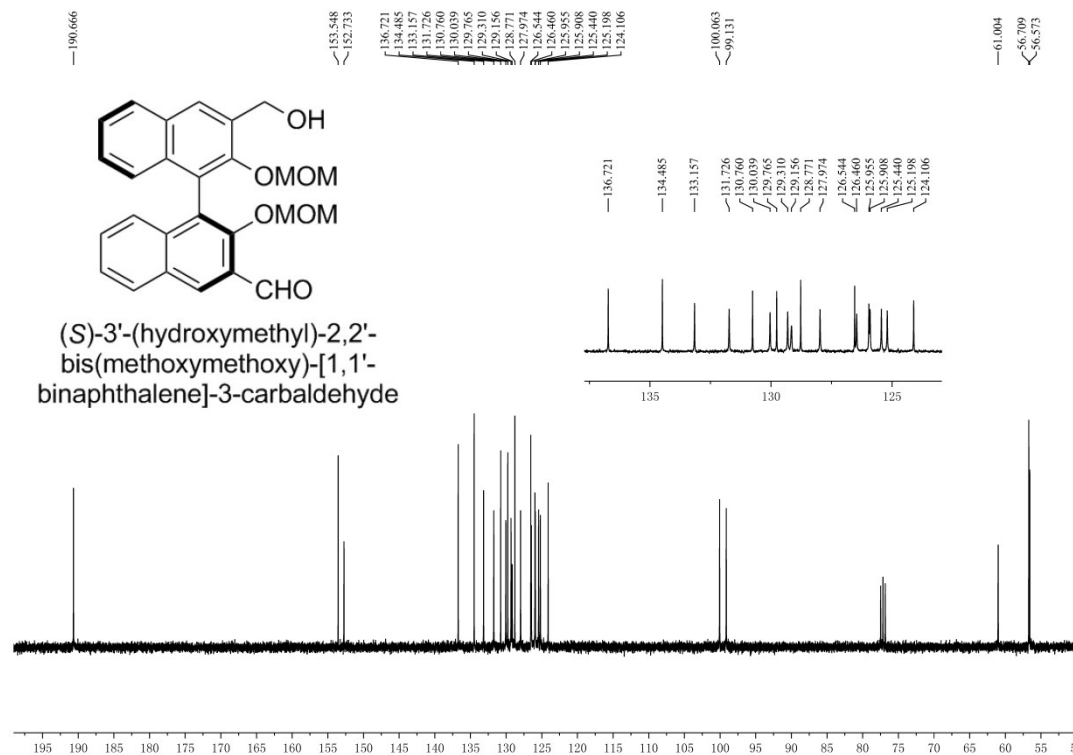

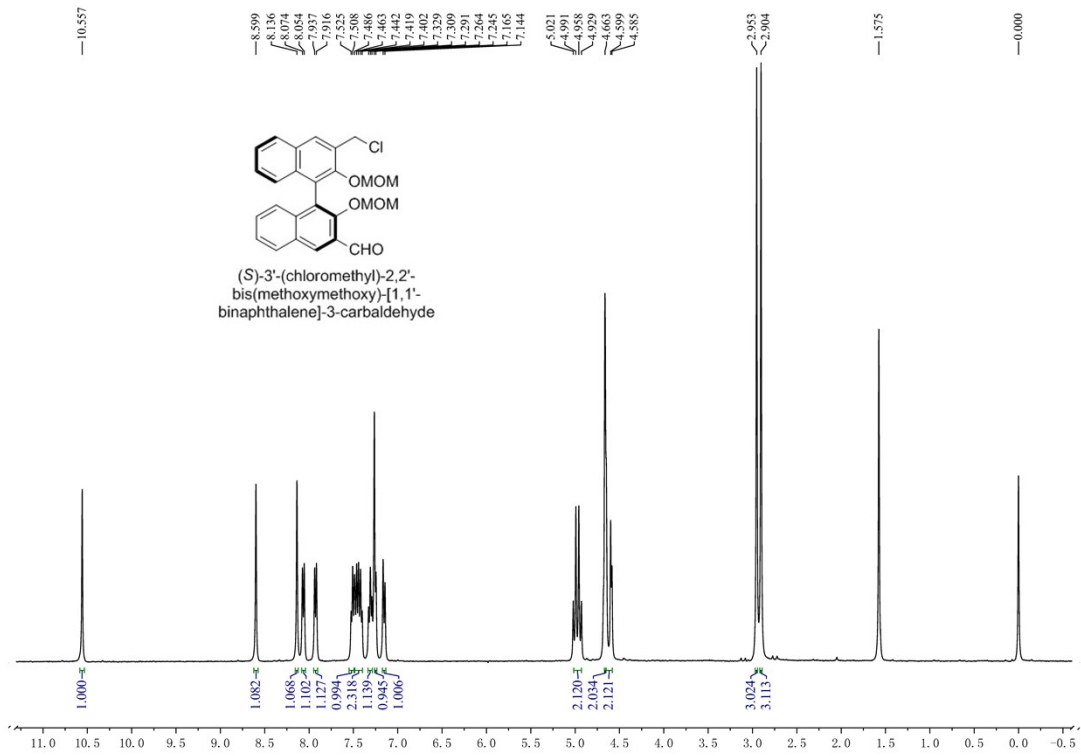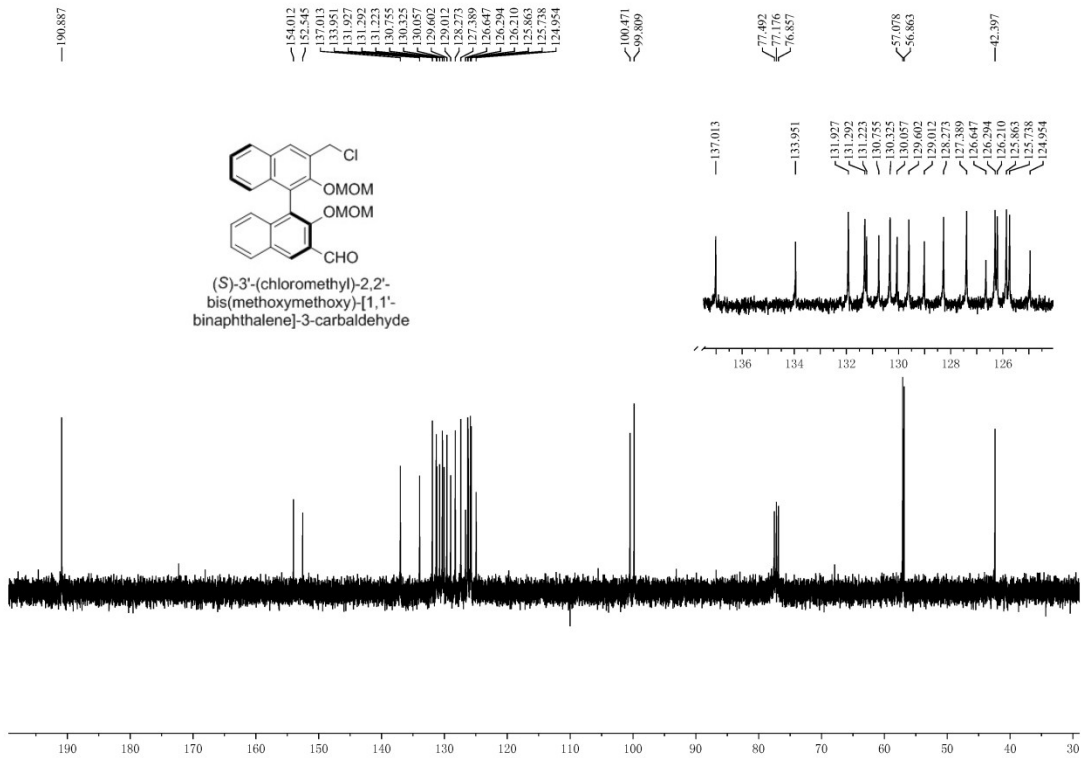

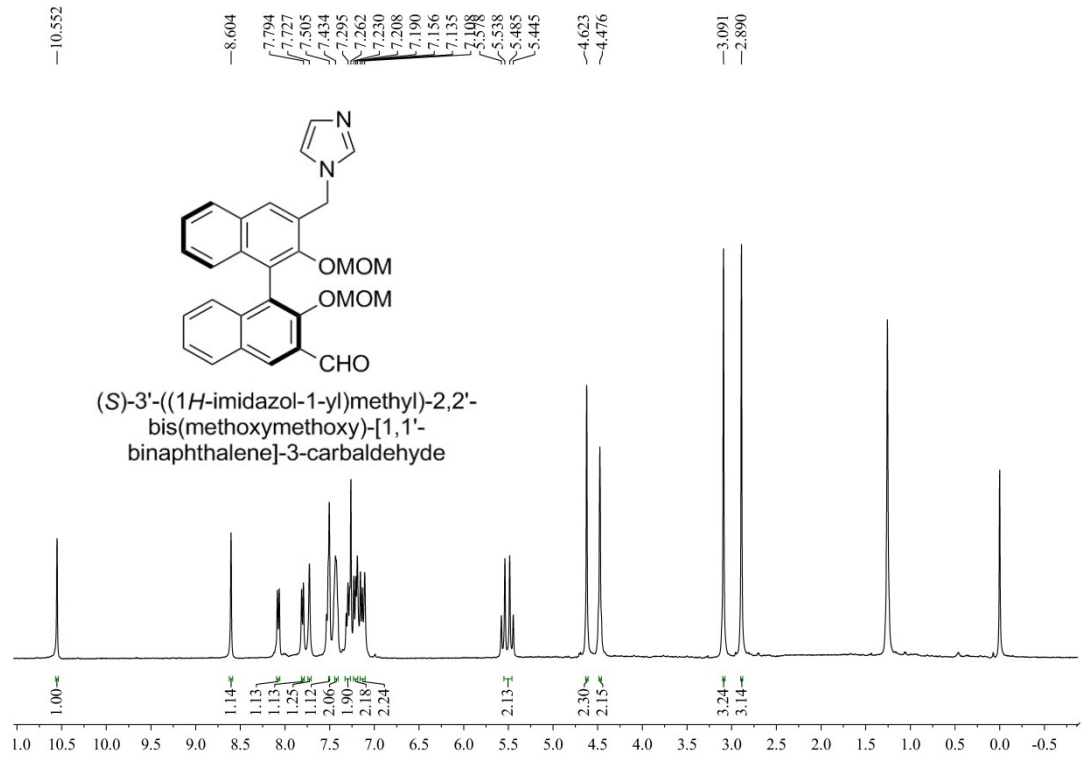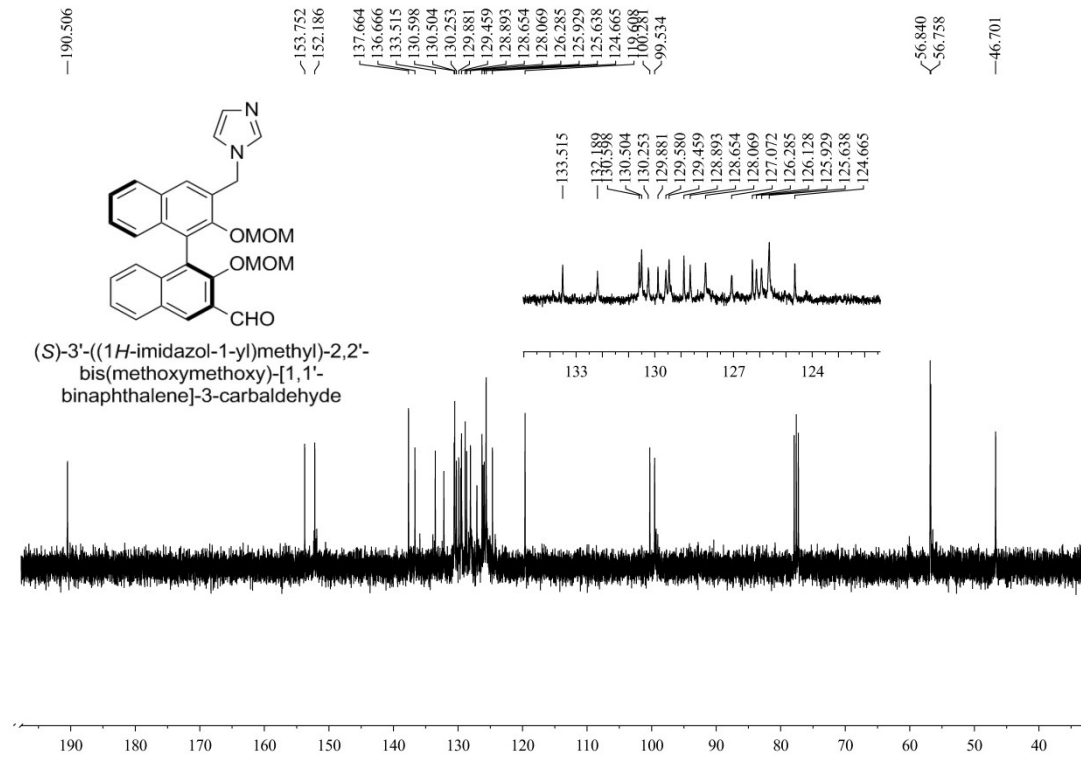

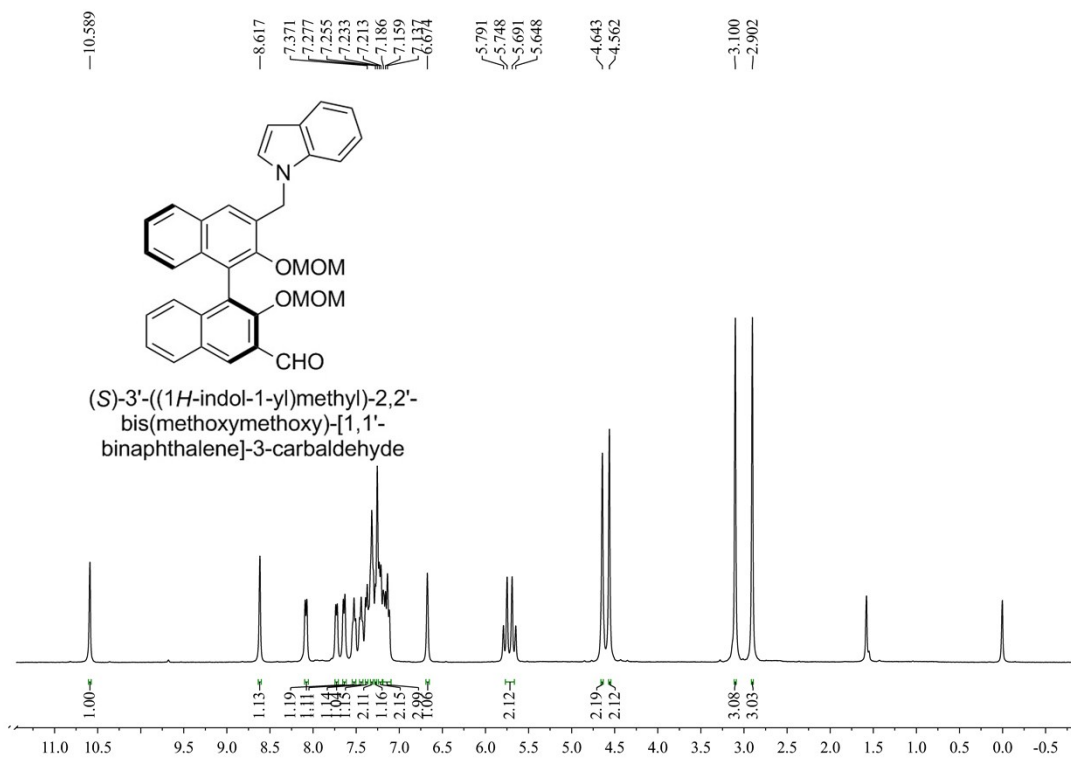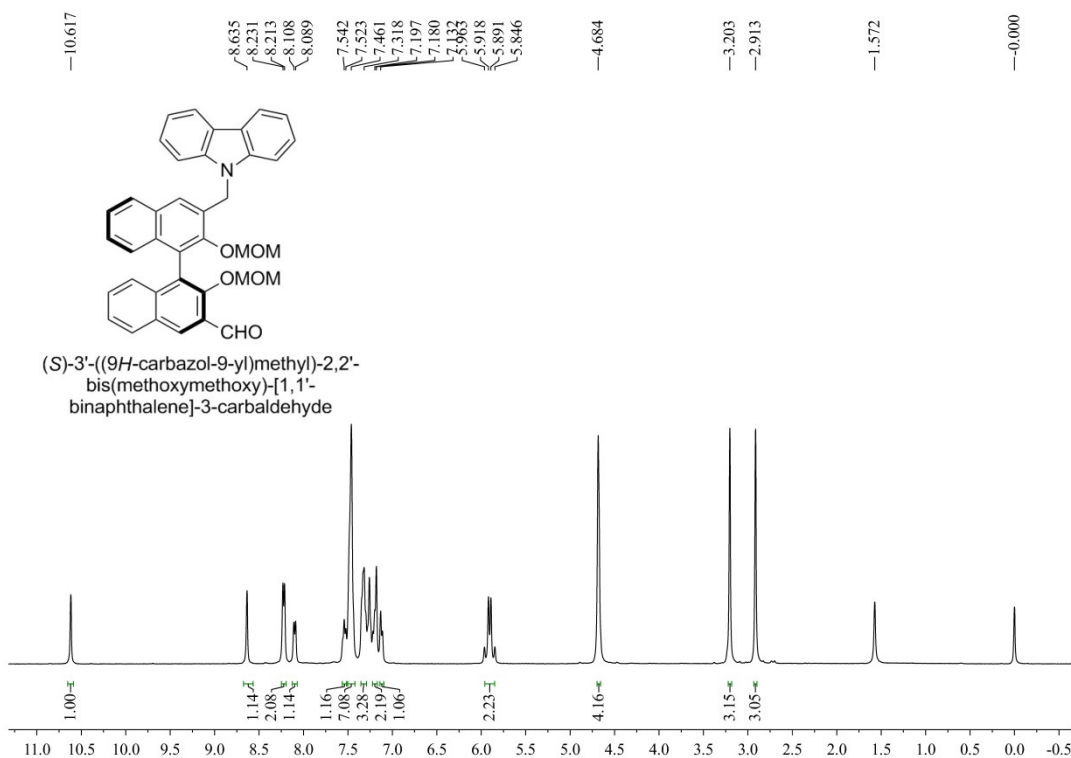

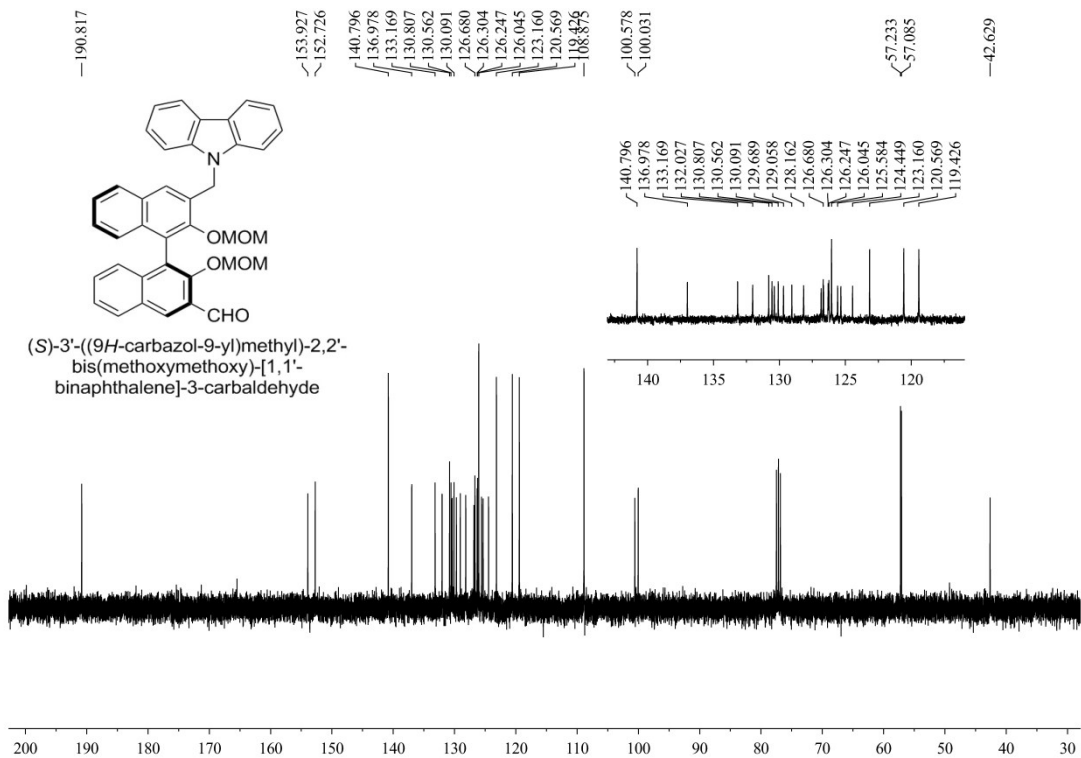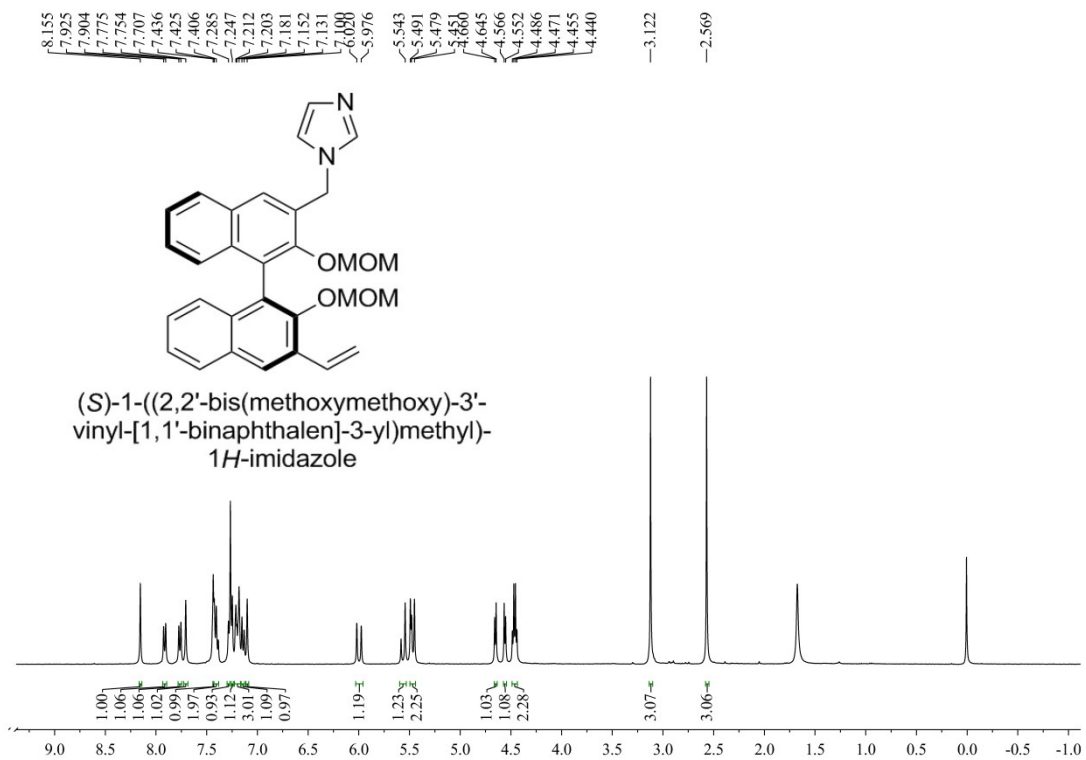



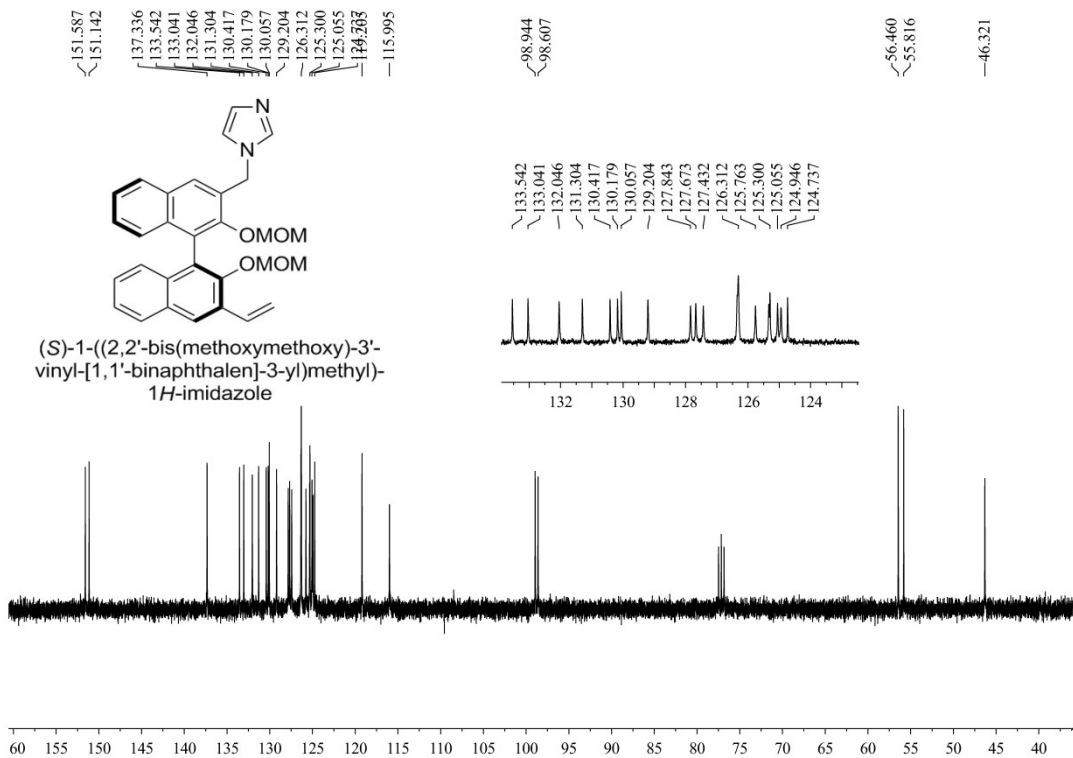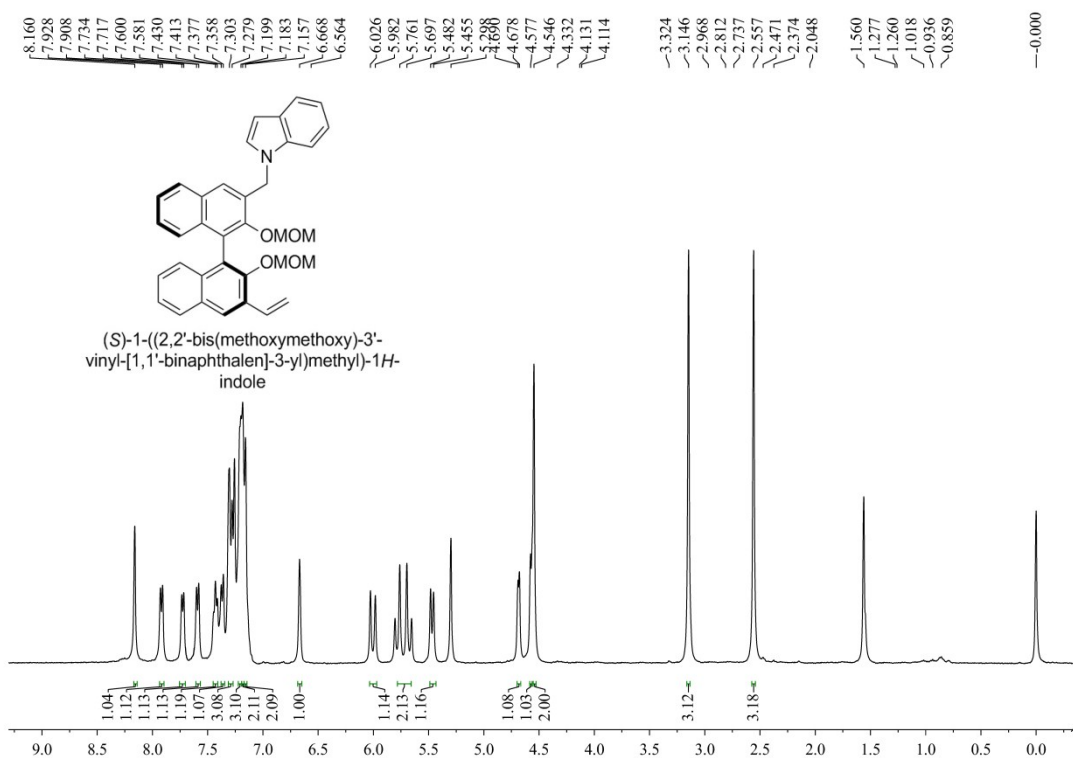

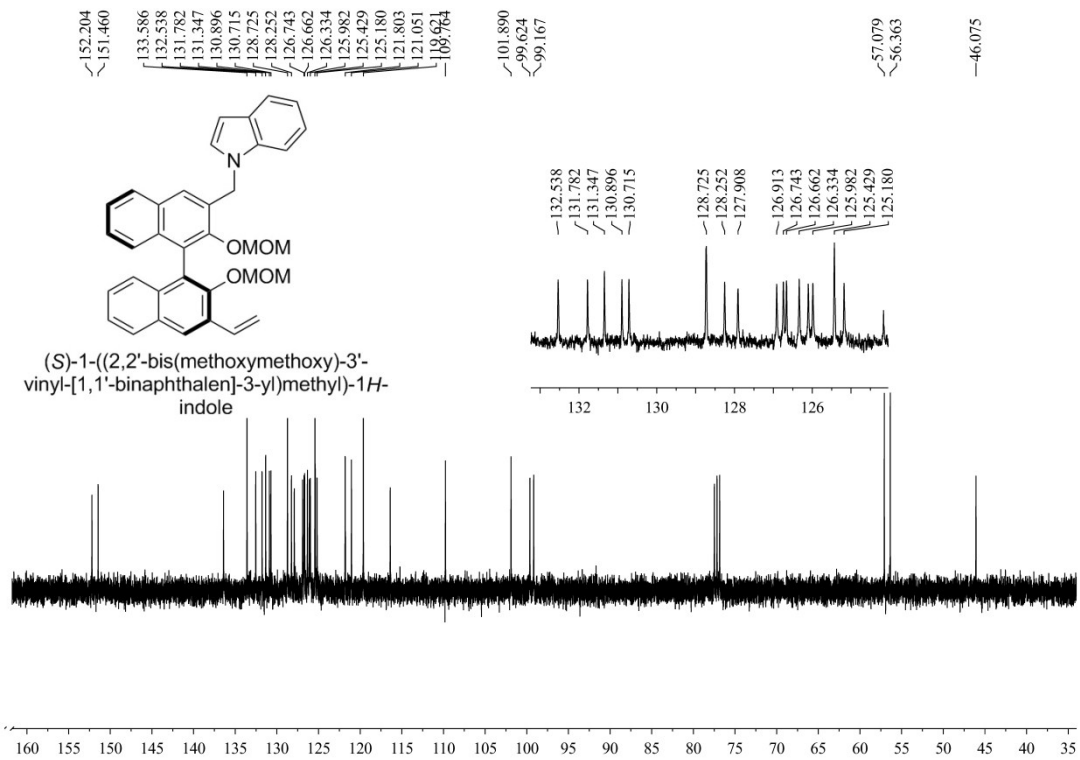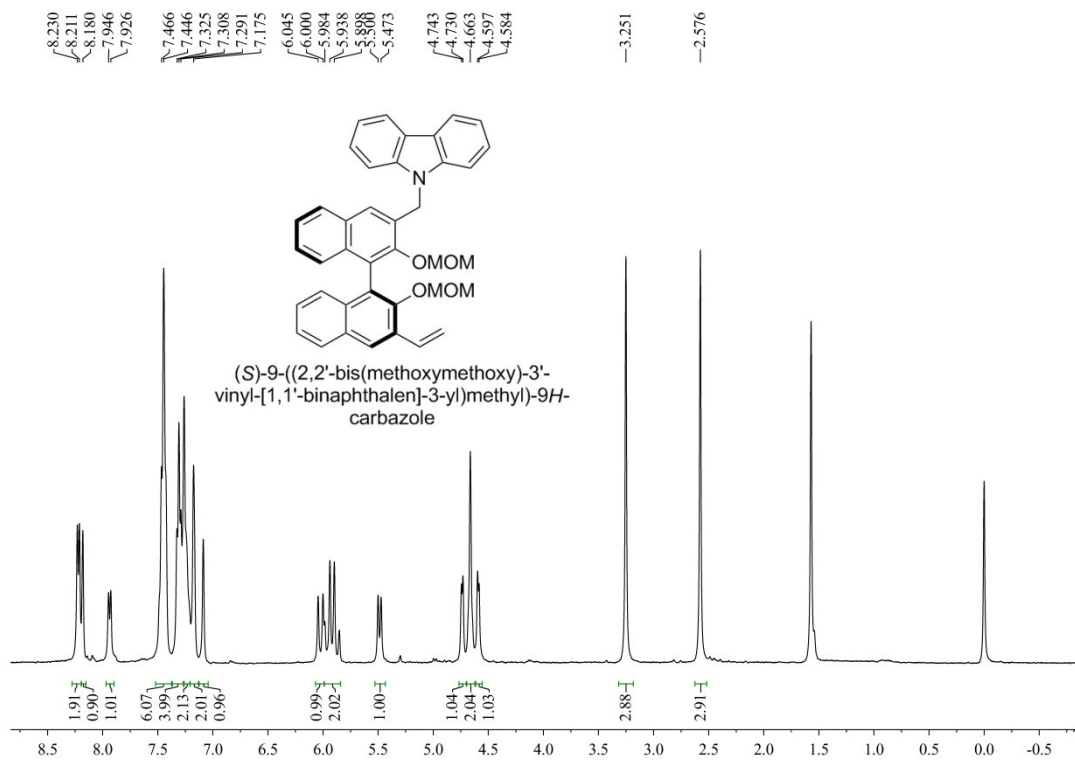

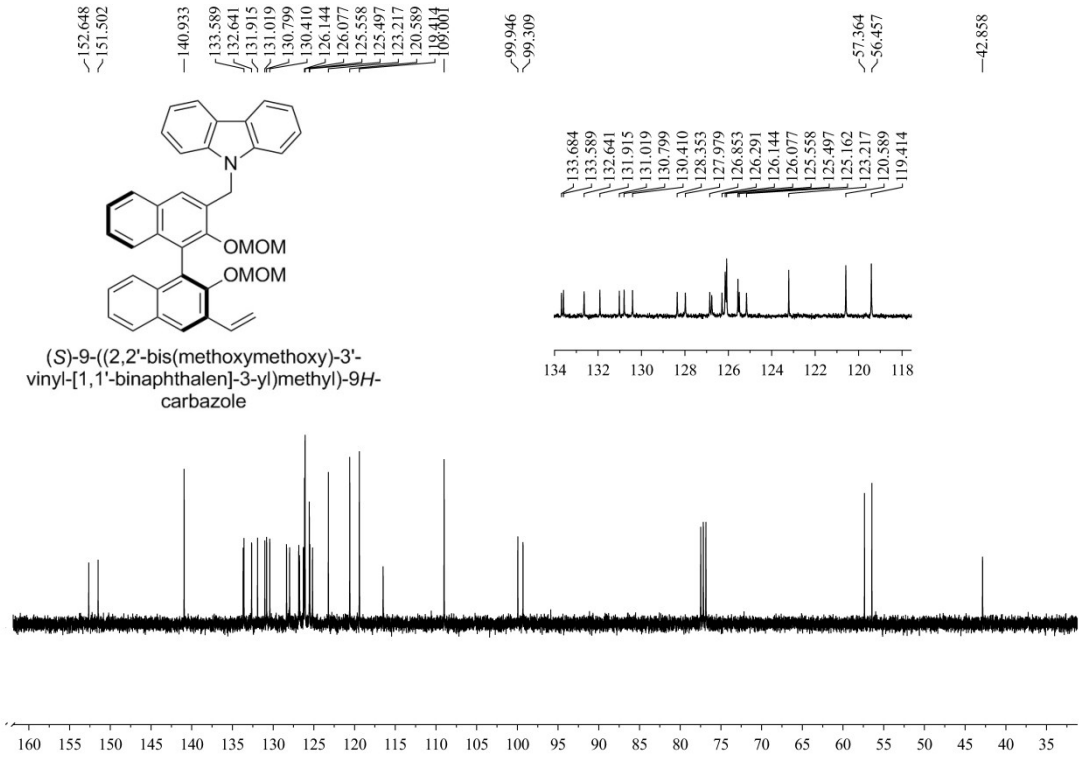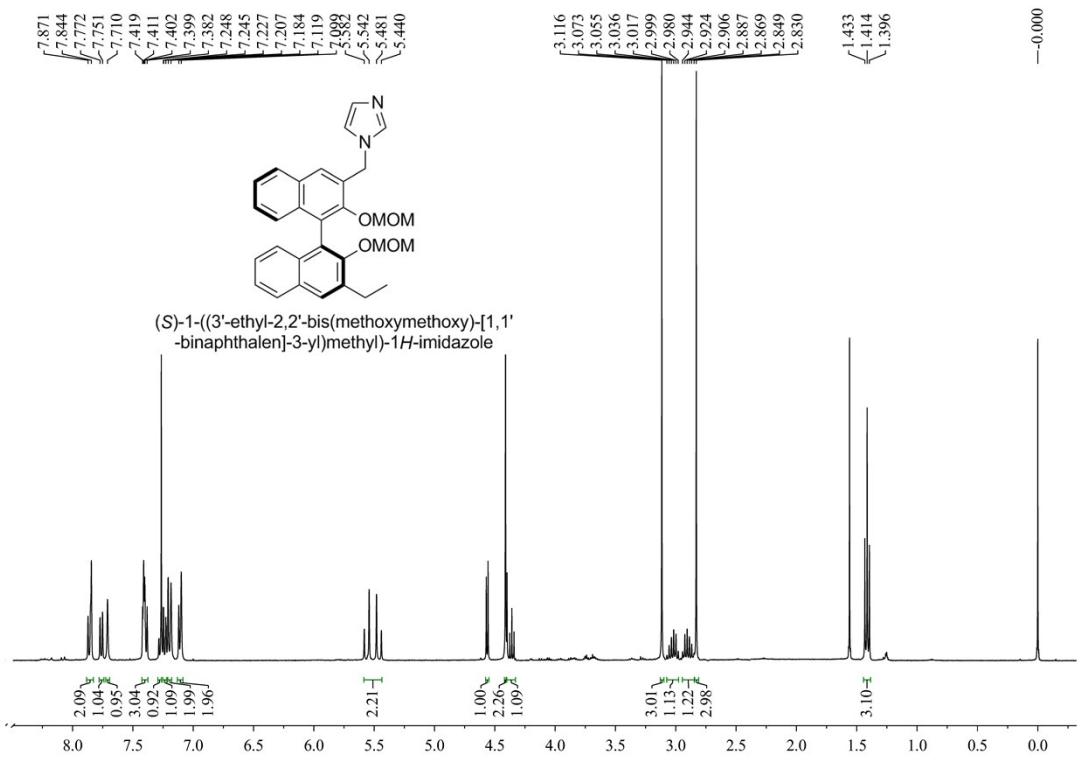

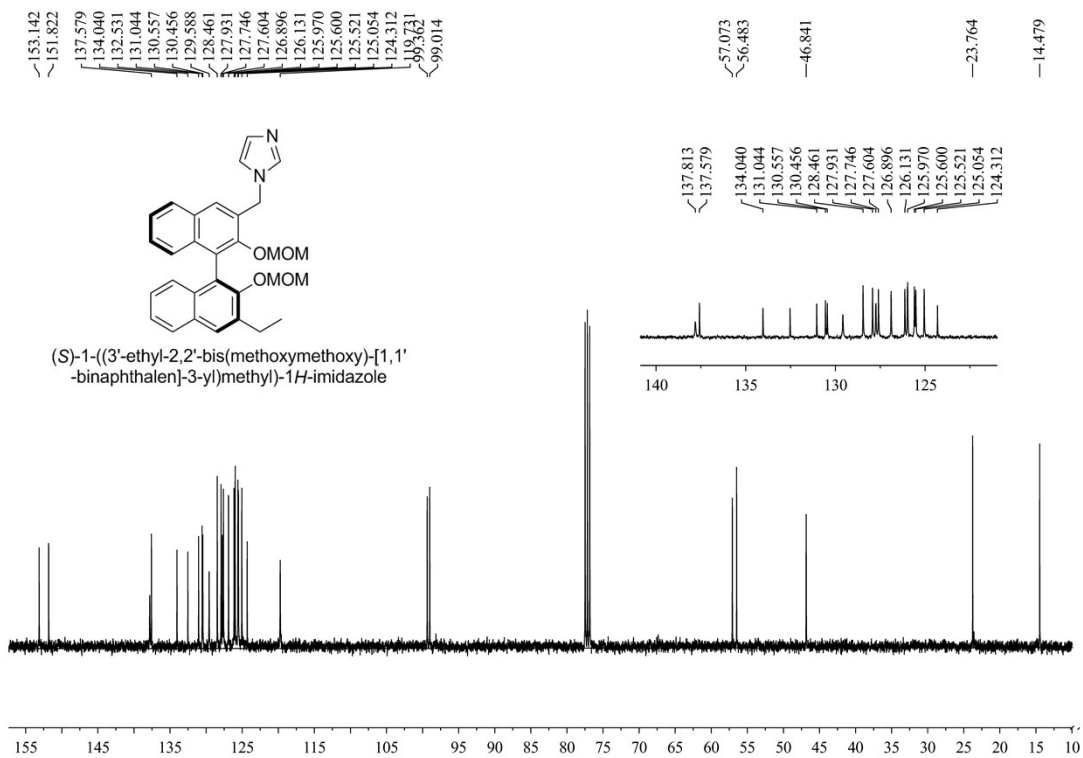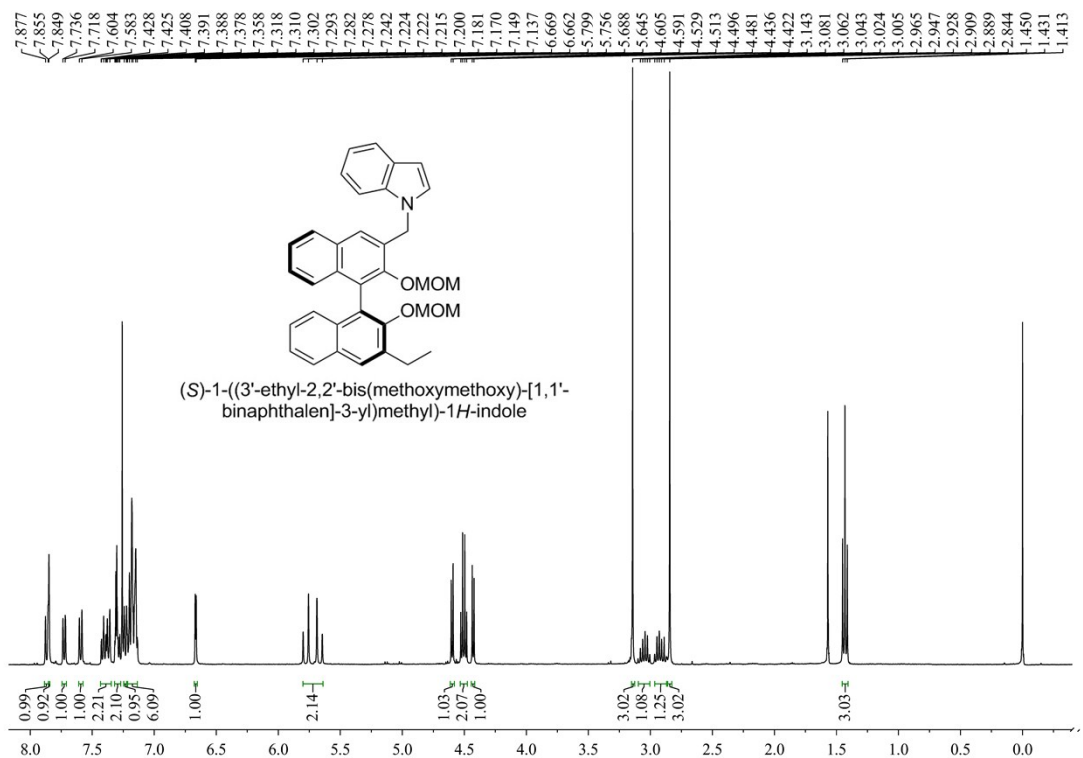

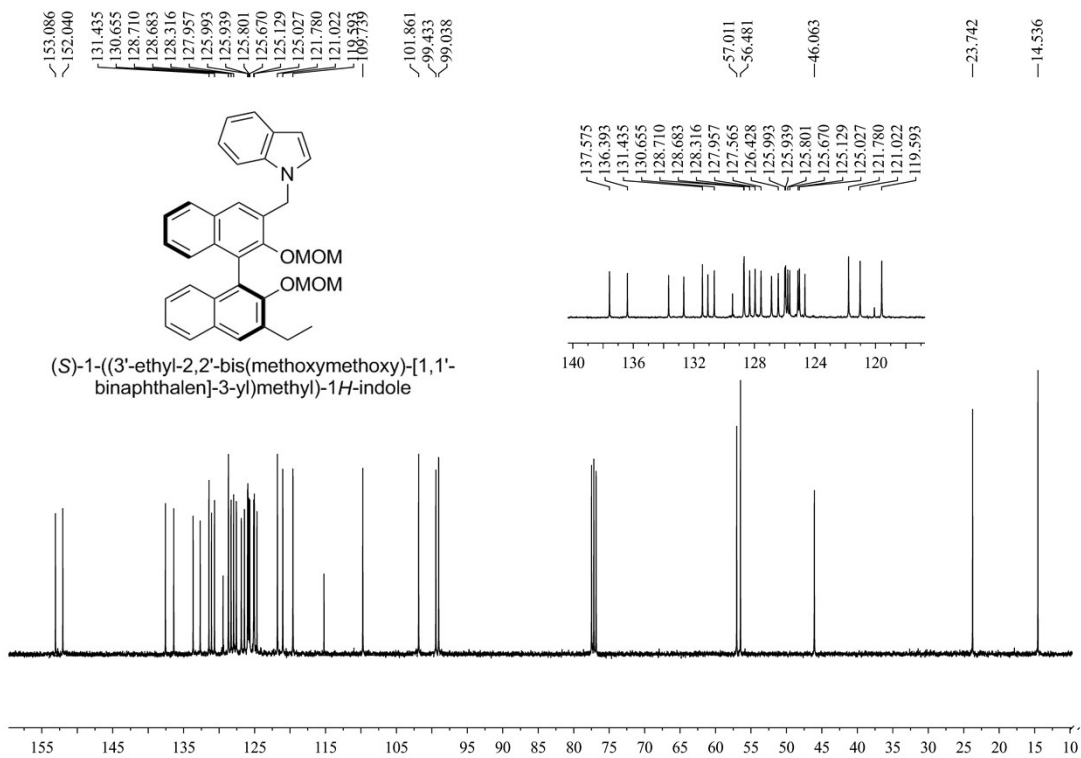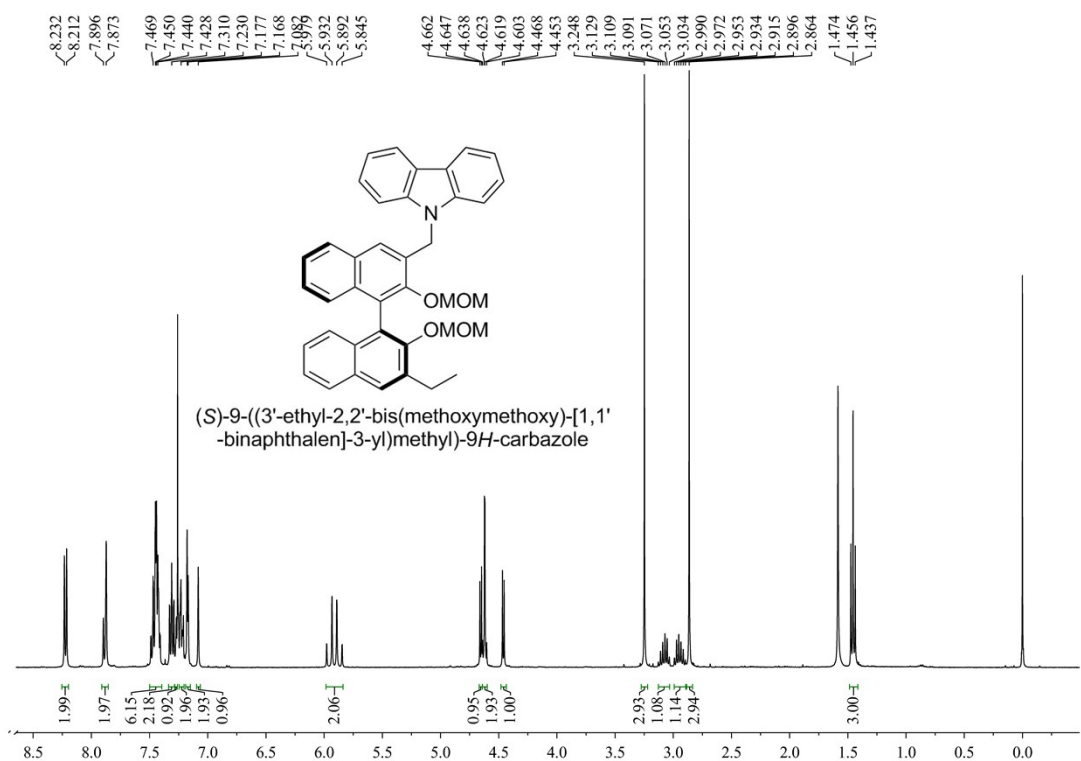

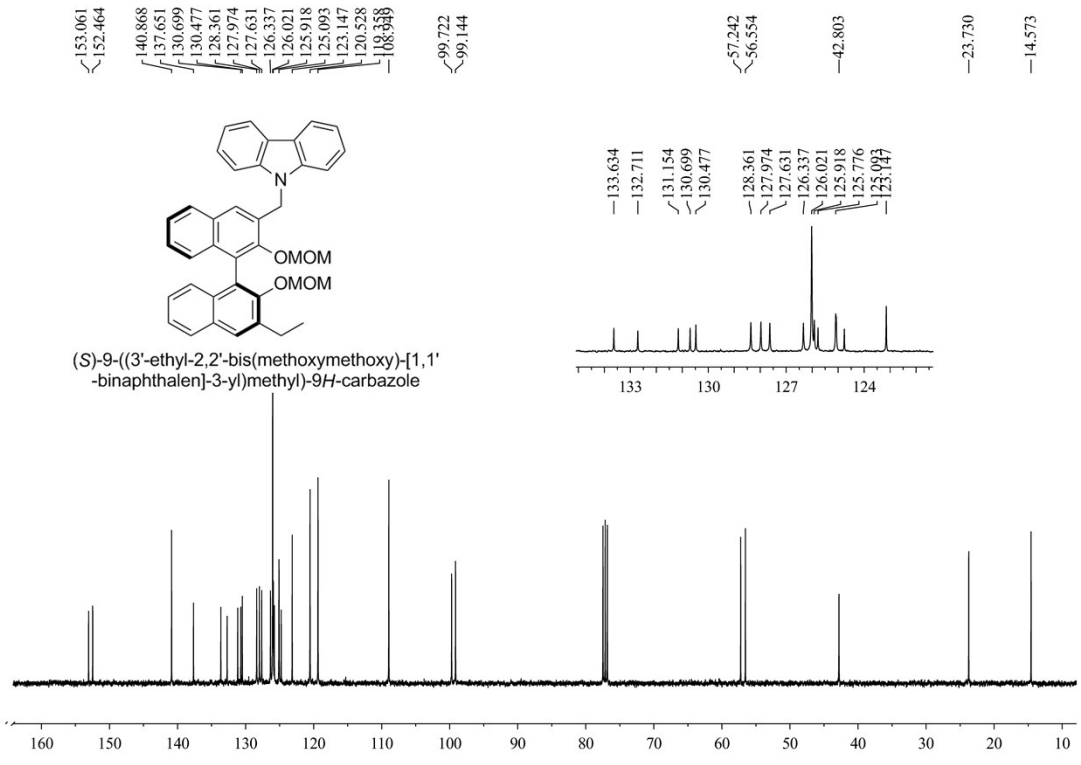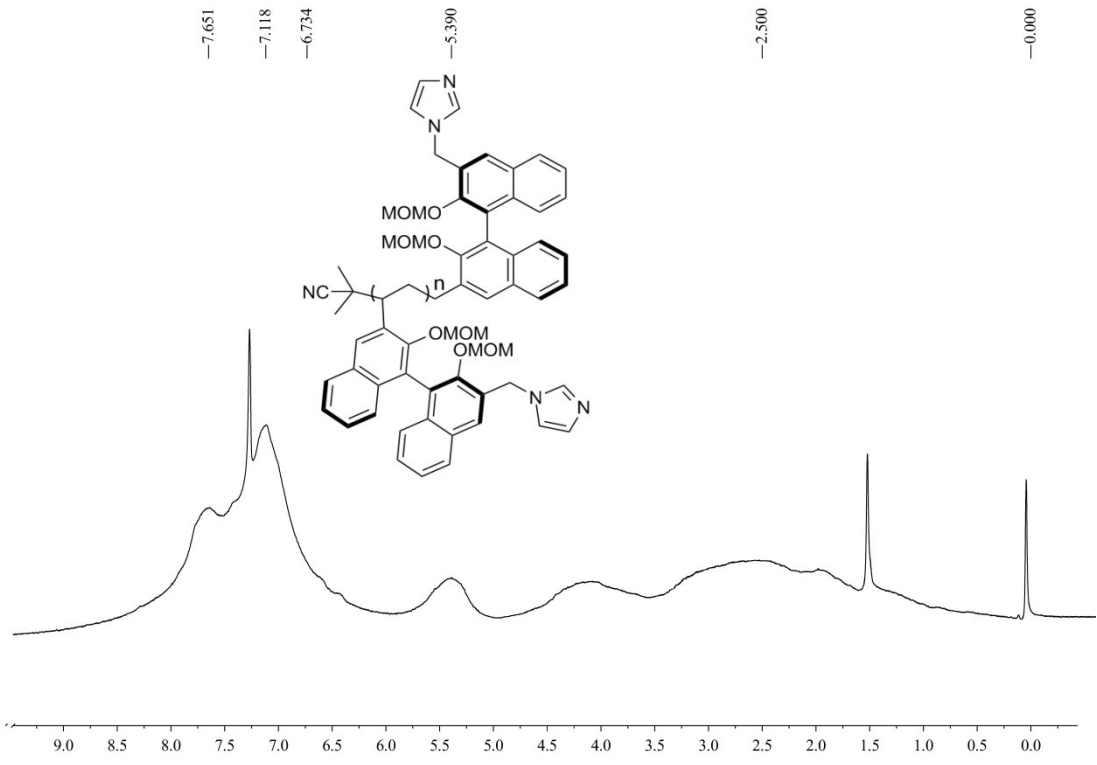

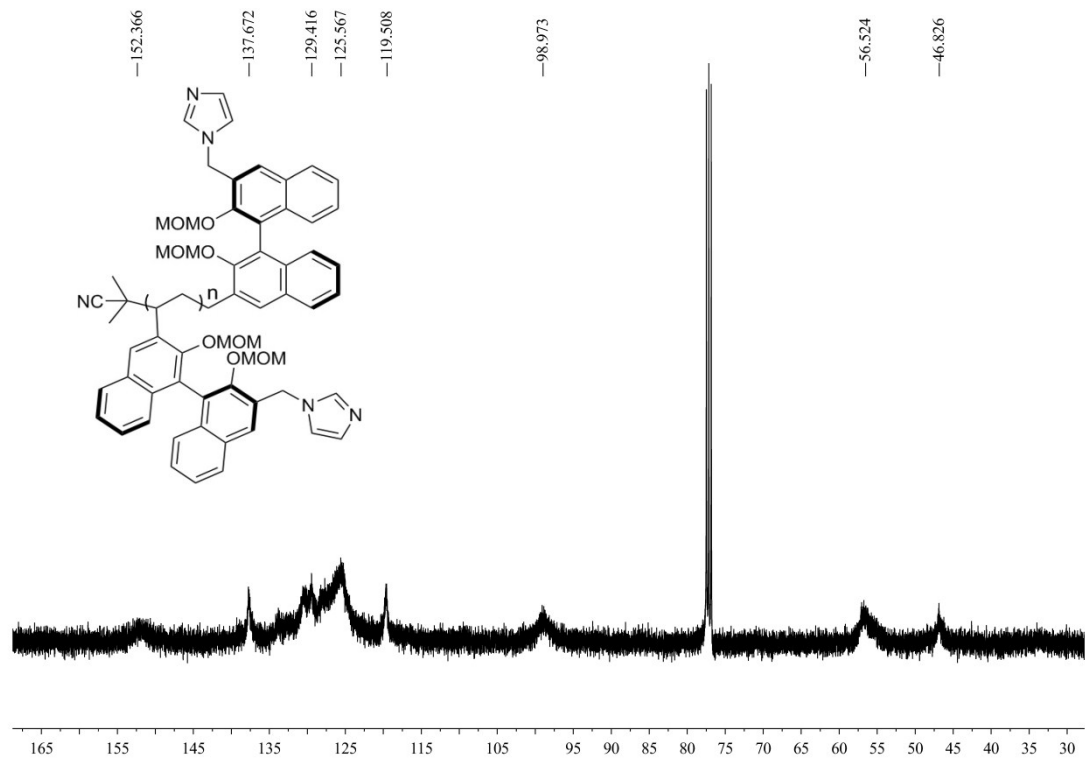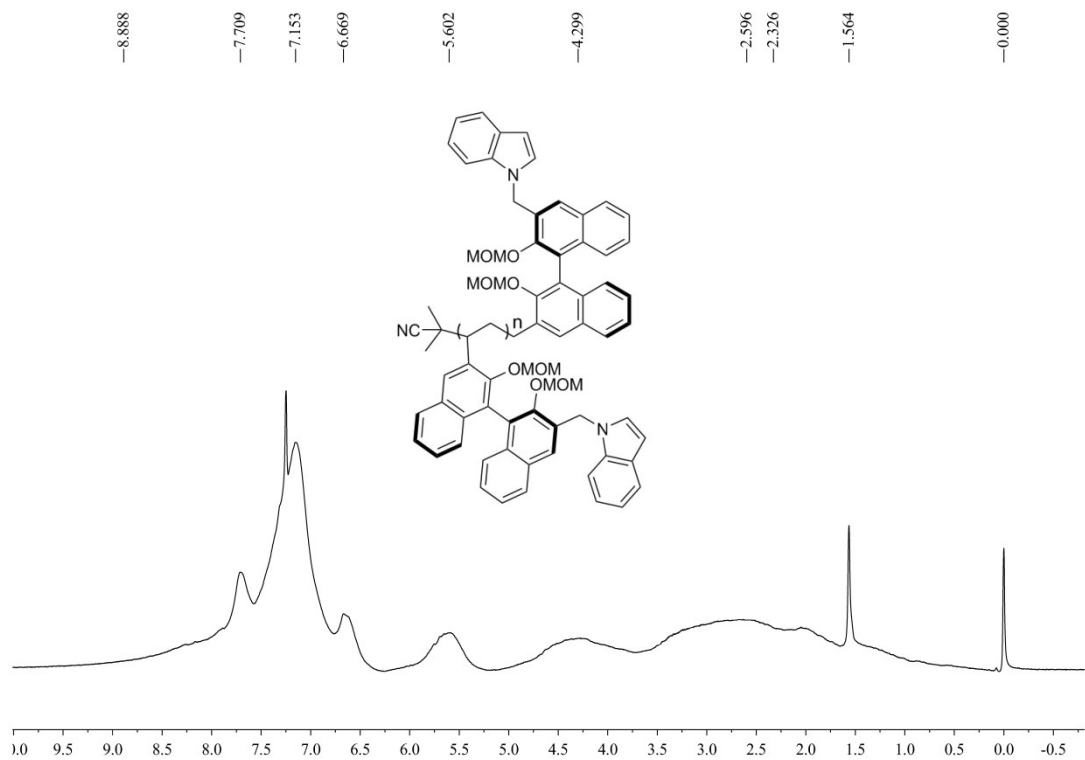

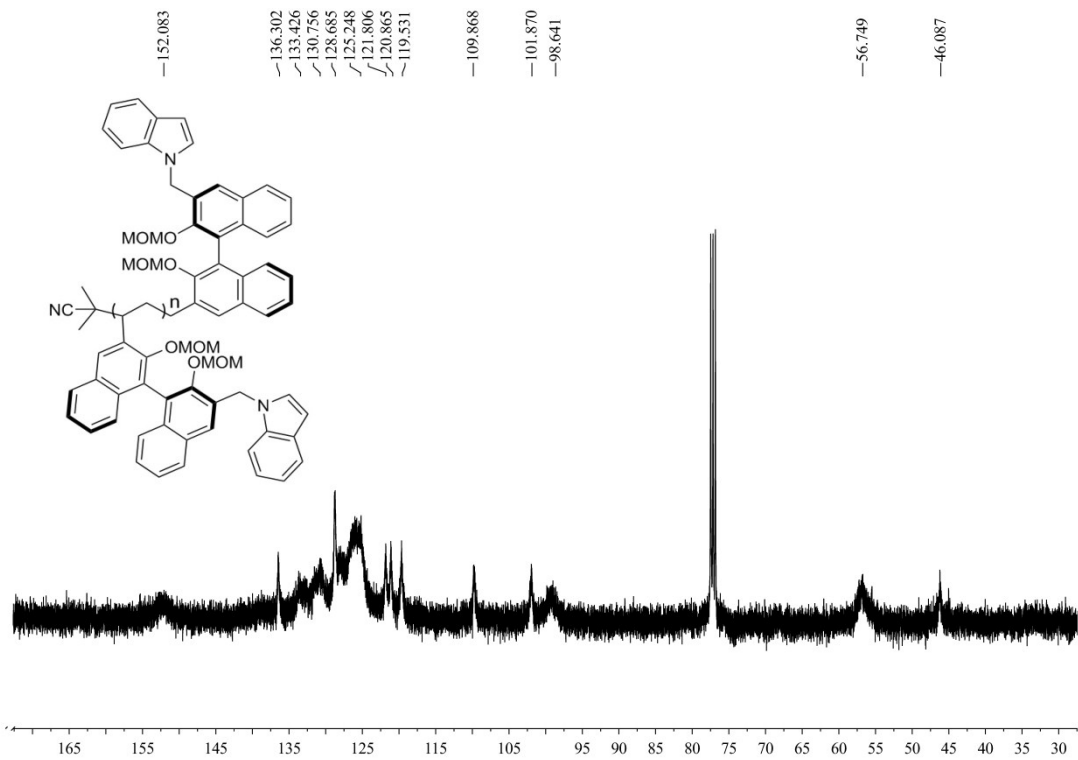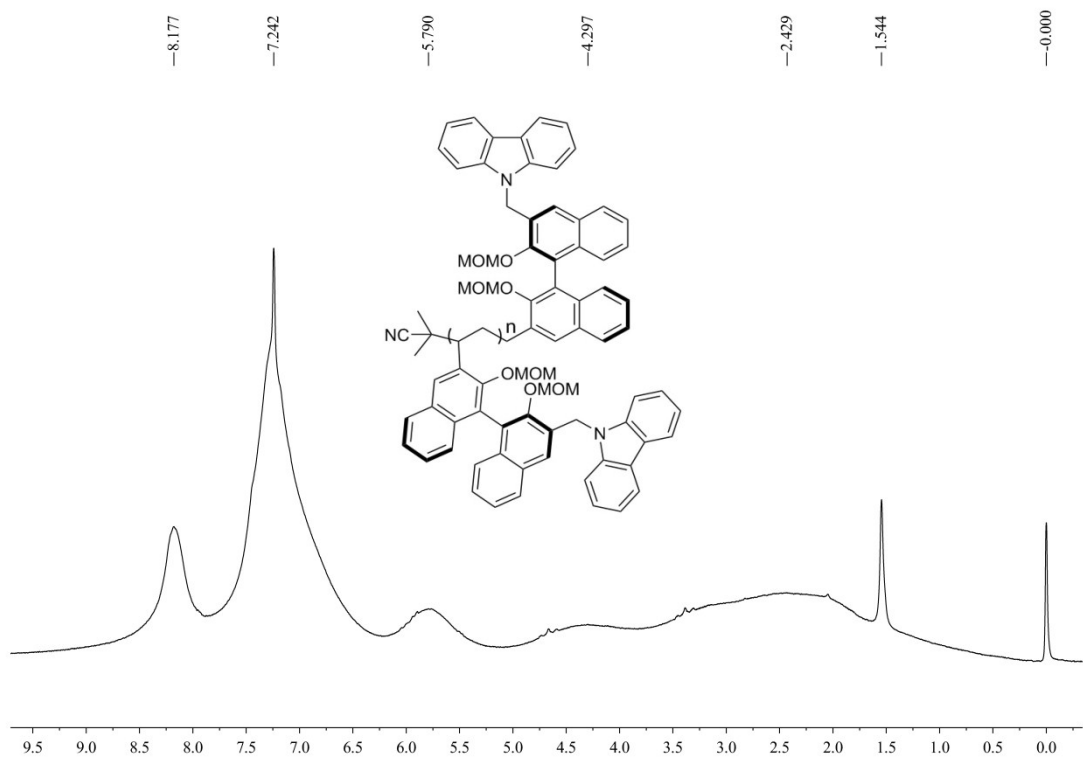



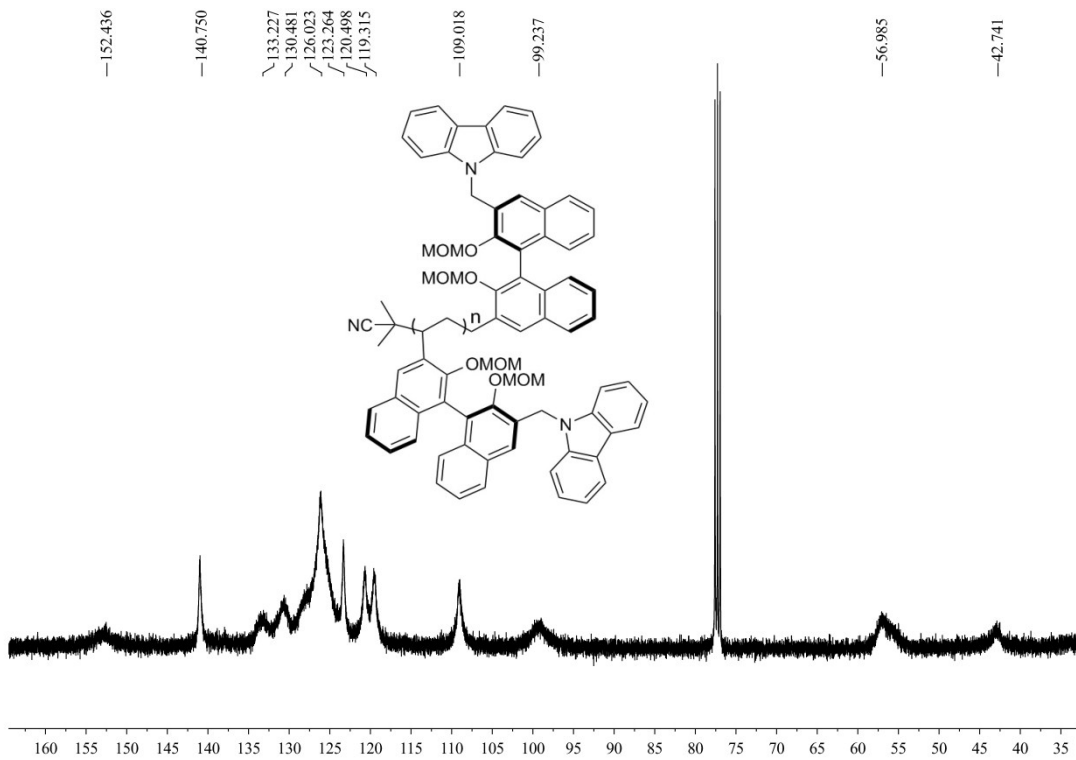

Supplement: c6ra08146k1.pdf [file c6ra08146k1.pdf]
